# Supplementary material for: Zusammenhänge etablierter HRV-Parameter mit selten verwendeten Parametern in Zeiträumen unterschiedlicher Dauer
Source: Springer Nature journal article supplement (doi:10.1007/s40664-023-00512-1), 2023-07-20
Supplement: MOESM1 [file 25826410]

| Stressindex (SI) |  |
| --- | --- |
| Adäquanzindex der Regulationsprozesse (RPAI) |  |
| Vegetative Rhythmusindex (VRI) |  |
| Index des vegetativen Gleichgewichts (VBI) |  |
| Variationskoeffizient (CV) |  |

Modalwert (häufigste gemessene Dauer eines NN-Intervalls)

Amplitude des Modalwertes (prozentualer Anteil der dem Modalwert entsprechenden NN-Intervalle an allen gemessenen NN-Intervallen)

Variationsbreite der NN-Intervalle (Differenz zwischen dem maximalen und minimalen gemessenen NN-Intervall)

durchschnittliche Dauer aller NN-Intervalle
